# Supplementary material for: Prediction of groundwater quality index to assess suitability for drinking purpose using averaged neural network and geospatial analysis
Source: Copernicus journal article supplement (doi:10.5194/hess-2022-86), 2022-06-01
Supplement: Supplementary file 1 [file hess-2022-86-supplement.pdf]

**Prediction of groundwater quality index to assess suitability for drinking purpose using averaged neural network and geospatial analysis**

Seok Hyun Ahn<sup>1,¶</sup>, Do Hwan Jeong<sup>2,¶</sup>, MoonSu Kim<sup>2</sup>, Tae Kwon Lee<sup>1,\*</sup>, Hyun-Koo Kim<sup>2,\*</sup>

<sup>1</sup>Department of Environmental Engineering, Yonsei University, Wonju 26493, South Korea

<sup>2</sup>Soil and Groundwater Division, National Institute of Environmental Research, Incheon 22689, South Korea

\*Correspondence:

HK Kim, email: khk228@korea.kr

TK Lee, email: tklee@yonsei.ac.kr

¶These authors contributed equally to this work.

## *Supplementary Material*

### 1 Supplementary tables

**Supplementary Table S1. Water quality standard for potable groundwater in Korea.**

| Category                       | Parameter             | Standard            | Category                     | Parameter                                  | Standard       |              |
|--------------------------------|-----------------------|---------------------|------------------------------|--------------------------------------------|----------------|--------------|
| Microorganism<br>( 4 )         | General Baceteria     | < 100 CFU / mL      | Harmful<br>organic<br>( 17 ) | Benzene                                    | < 0.01 mg / L  |              |
|                                | Total Coliform        | Undetected / 100 mL |                              | Toluene                                    | < 0.7 mg / L   |              |
|                                | Fecal Coliform        | Undetected / 100 mL |                              | Ethylbenzene                               | < 0.3 mg / L   |              |
|                                | Escherichia coli      | Undetected / 100 mL |                              | Xylene                                     | < 0.5 mg / L   |              |
| Harmful<br>inorganic<br>( 11 ) | Lead                  | < 0.01 mg / L       |                              | 1,1-Dichloroethylene                       | < 0.03 mg / L  |              |
|                                | Fluoride              | < 1.5 mg / L        |                              | Carbon tetrachloride                       | < 0.002 mg / L |              |
|                                | Arsenic               | < 0.01 mg / L       |                              | 1,2-Dibromo-3-chloropropane                | < 0.003 mg / L |              |
|                                | Selenium              | < 0.01 mg / L       |                              | 1,4-dioxane                                | < 0.05 mg / L  |              |
|                                | Mercury               | < 0.001 mg / L      |                              | Total hardness                             | < 300 mg / L   |              |
|                                | Cyanide               | < 0.01 mg / L       |                              | Potassium permanganate consumption         | < 10 mg / L    |              |
|                                | Chromium              | < 0.05 mg / L       |                              | Smell                                      | No smell       |              |
|                                | Ammonia               | < 0.5 mg / L        |                              | Taste                                      | No taste       |              |
|                                | Nitrate               | < 10 mg / L         |                              | Color                                      | < 5 degree     |              |
|                                | Cadmium               | < 0.005 mg / L      |                              | Detergent                                  | < 0.5 mg / L   |              |
|                                | Boron                 | < 1.0 mg / L        |                              | Copper                                     | < 1.0 mg / L   |              |
| Harmful<br>organic<br>( 17 )   | Phenol                | < 0.005 mg / L      |                              | Aesthetic<br>Impact<br>Substance<br>( 15 ) | pH             | 5.8 - 8.5    |
|                                | Diazinon              | < 0.02 mg / L       |                              |                                            | Zinc           | < 3.0 mg / L |
|                                | Parathion             | < 0.06 mg / L       | Chloride                     |                                            | < 250 mg / L   |              |
|                                | Fenitrothion          | < 0.04 mg / L       | Iron                         |                                            | < 0.3 mg / L   |              |
|                                | Carbaryl              | < 0.07 mg / L       | Manganese                    |                                            | < 0.05 mg / L  |              |
|                                | 1,1,1-Trichloroethane | < 0.1 mg / L        | Turbidity                    |                                            | < 0.5 NTU      |              |
|                                | Tetrachloroethene     | < 0.01 mg / L       | Sulfate                      |                                            | < 200mg / L    |              |
|                                | Trichloroethene       | < 0.03 mg / L       | Aluminum                     |                                            | < 0.2 mg / L   |              |
| Dichloromethane                | < 0.02 mg / L         |                     |                              |                                            |                |              |

Supplementary figures

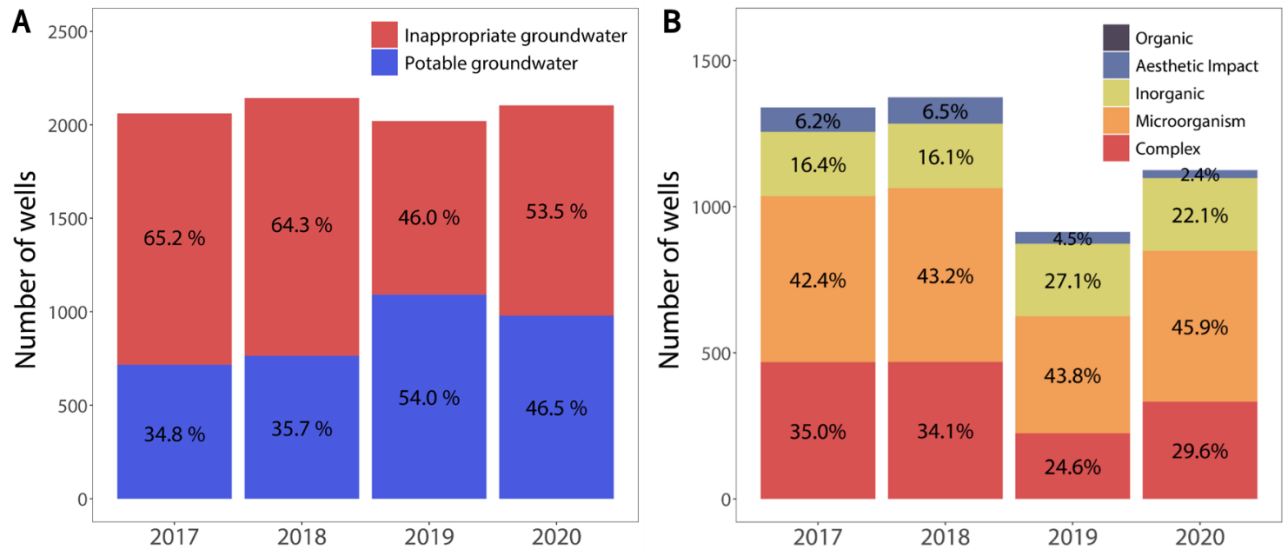

**Figure S2. (A) Proportion of potable groundwater passed through groundwater quality standards (2017 ~ 2019). (B) The main sources of pollution of groundwater (2017 ~2019)**

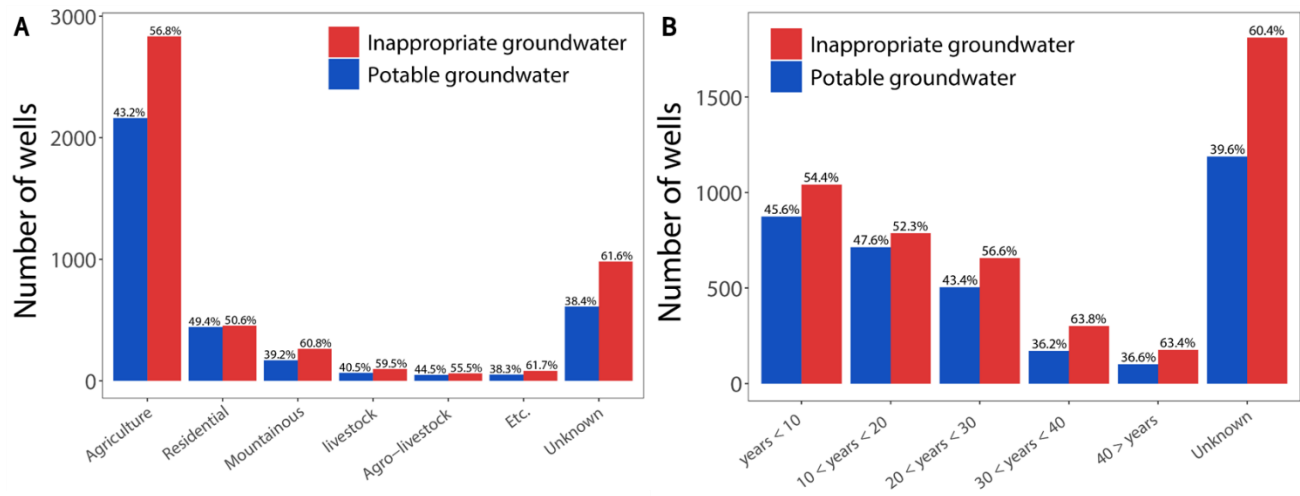

**Figure S2. (A) Proportion of potable groundwater according to land-use (B) Proportion of potable groundwater according to the year of well development.**

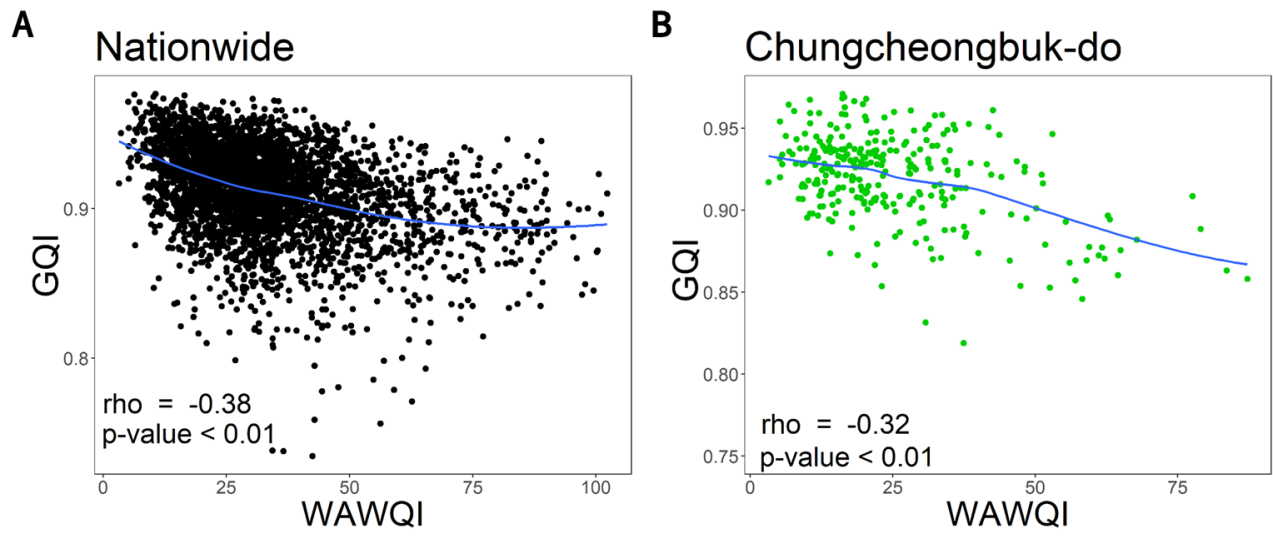

**Figure S3.** The correlation between WAWQI and GQI was visualized using a scatter plot. (A) nationwide, (B) Chungcheongbuk-do.

**A**

2017

| Prediction      | Reference |      |           |
|-----------------|-----------|------|-----------|
|                 | Worrisome | Good | Very good |
| Worrisome       | 83        | 1    | 0         |
| Good            | 2         | 477  | 0         |
| Very good       | 0         | 0    | 154       |
| <b>Accuracy</b> |           |      | 0.996     |
| <b>Kappa</b>    |           |      | 0.992     |

**B**

2018

| Prediction      | Reference |      |           |
|-----------------|-----------|------|-----------|
|                 | Worrisome | Good | Very good |
| Worrisome       | 222       | 1    | 0         |
| Good            | 7         | 420  | 0         |
| Very good       | 0         | 2    | 113       |
| <b>Accuracy</b> |           |      | 0.987     |
| <b>Kappa</b>    |           |      | 0.978     |

**C**

2019

| Prediction      | Reference |      |           |
|-----------------|-----------|------|-----------|
|                 | Worrisome | Good | Very good |
| Worrisome       | 231       | 0    | 0         |
| Good            | 6         | 699  | 0         |
| Very good       | 0         | 1    | 154       |
| <b>Accuracy</b> |           |      | 0.994     |
| <b>Kappa</b>    |           |      | 0.988     |

**D**

2020

| Prediction      | Reference |      |           |
|-----------------|-----------|------|-----------|
|                 | Worrisome | Good | Very good |
| Worrisome       | 163       | 4    | 0         |
| Good            | 0         | 619  | 1         |
| Very good       | 0         | 5    | 187       |
| <b>Accuracy</b> |           |      | 0.990     |
| <b>Kappa</b>    |           |      | 0.981     |

**Figure S4. Confusion matrix of the best performing Averaged Neural Network model for (A) 2017 year, (B) 2018 year, (C) 2019 year, and (D) 2020 year.** The column represents the groundwater vulnerability grade based on the distance score of the existing data, and row is the result of predicting the groundwater vulnerability grade with the averaged neural network model.

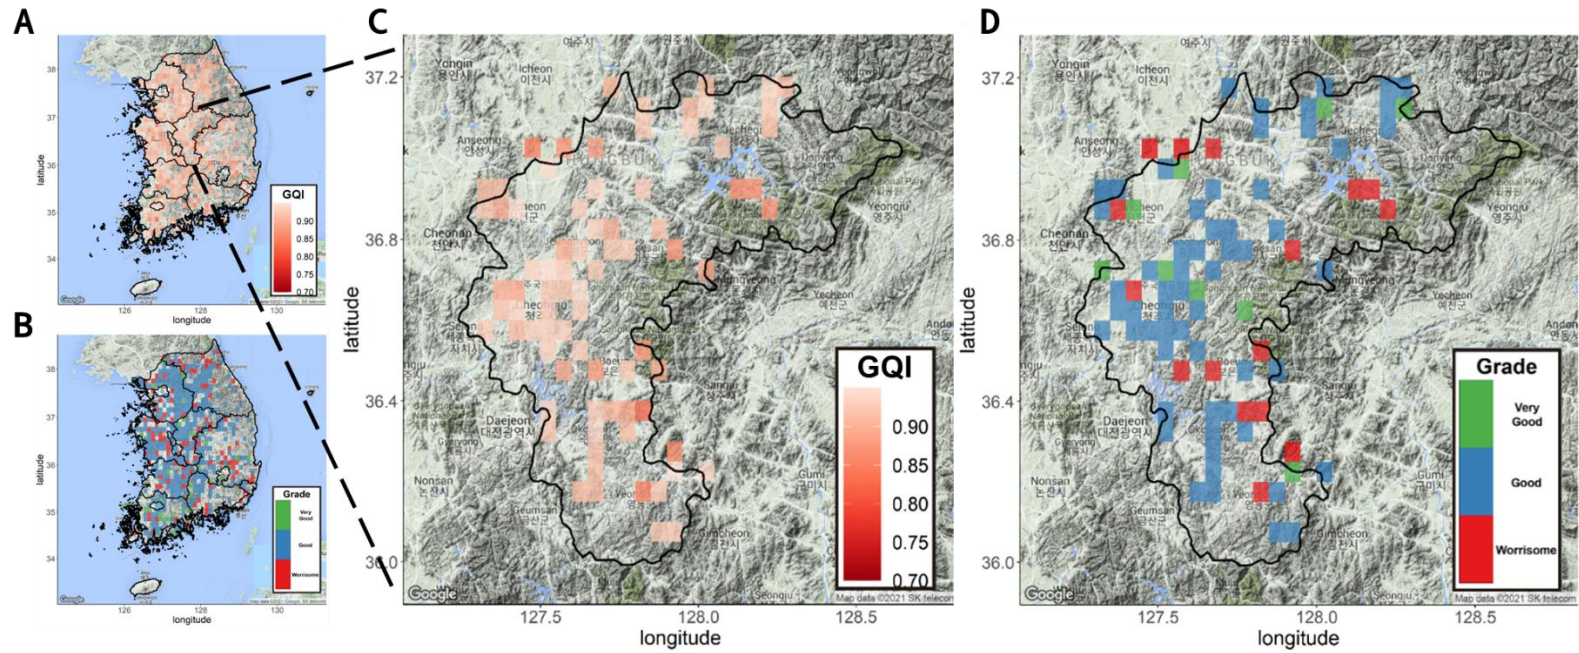

**Figure S5. The GQI of potable groundwater were binned and displayed on the map (A) nationwide (C) Chungcheongbuk-do. The grades of binned area were visualized in the map (B) nationwide (D) Chungcheongbuk-do.**
